# Supplementary material for: Influence of cobalt substitution on the crystal structure, band edges and photocatalytic properties of hierarchical Bi2WO6 microspheres
Source: Royal Society of Chemistry journal article supplement (doi:10.1039/c9nj00170k), 2019-01-01
Supplement: c9nj00170k1.pdf [file c9nj00170k1.pdf]

## Supporting Information

### Influence of cobalt substitution on the crystal structure, band edges and photocatalytic property of hierarchical $\text{Bi}_2\text{WO}_6$ microsphere

Veerappan Kavinkumar <sup>a</sup>, Dhayanantha Prabu Jaihindh<sup>b</sup>, Atul Verma<sup>b</sup>, K. Jothivenkatachalam<sup>a, \*</sup>

Yen-Pei Fu<sup>b, \*</sup>

<sup>a</sup>Department of Chemistry, Anna University, BIT Campus, Tiruchirappalli, 620024, Tamilnadu, India

<sup>b</sup>Department of Materials Science and Engineering, National Dong Hwa University, Hualien, 97401, Taiwan

Figure S1.

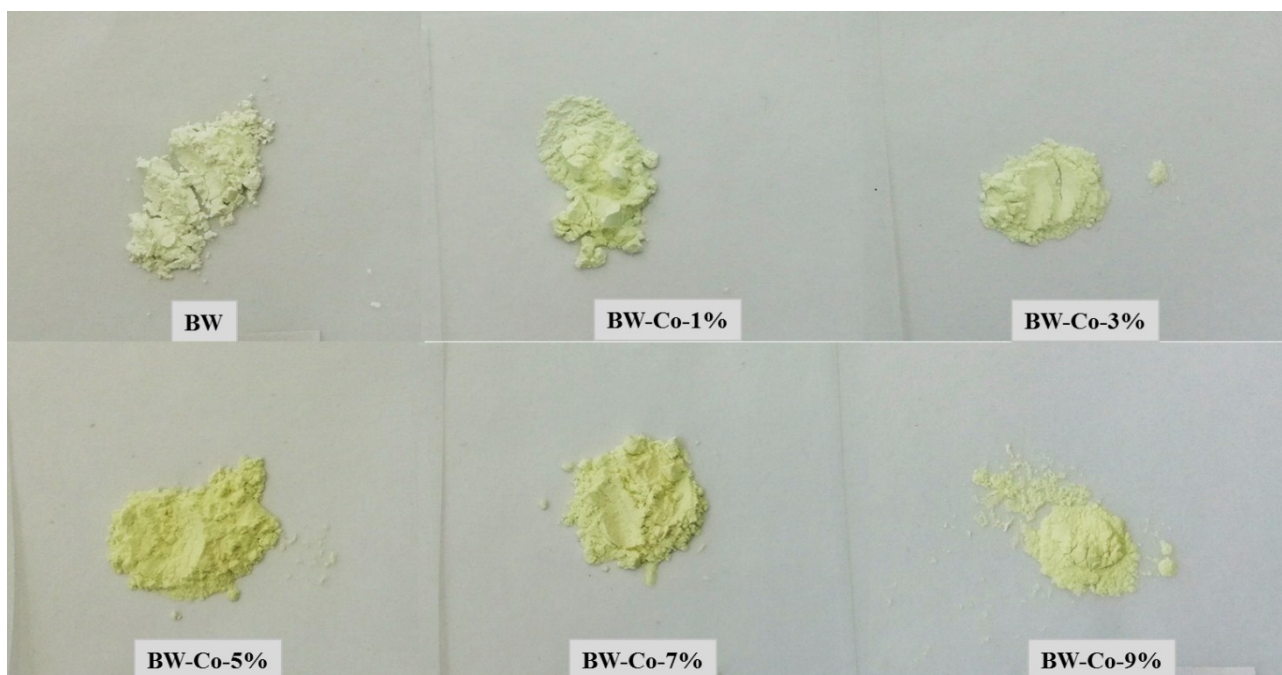

Figure S1. Photographs of prepared  $\text{Bi}_2\text{WO}_6$ -based powders

Figure S2.

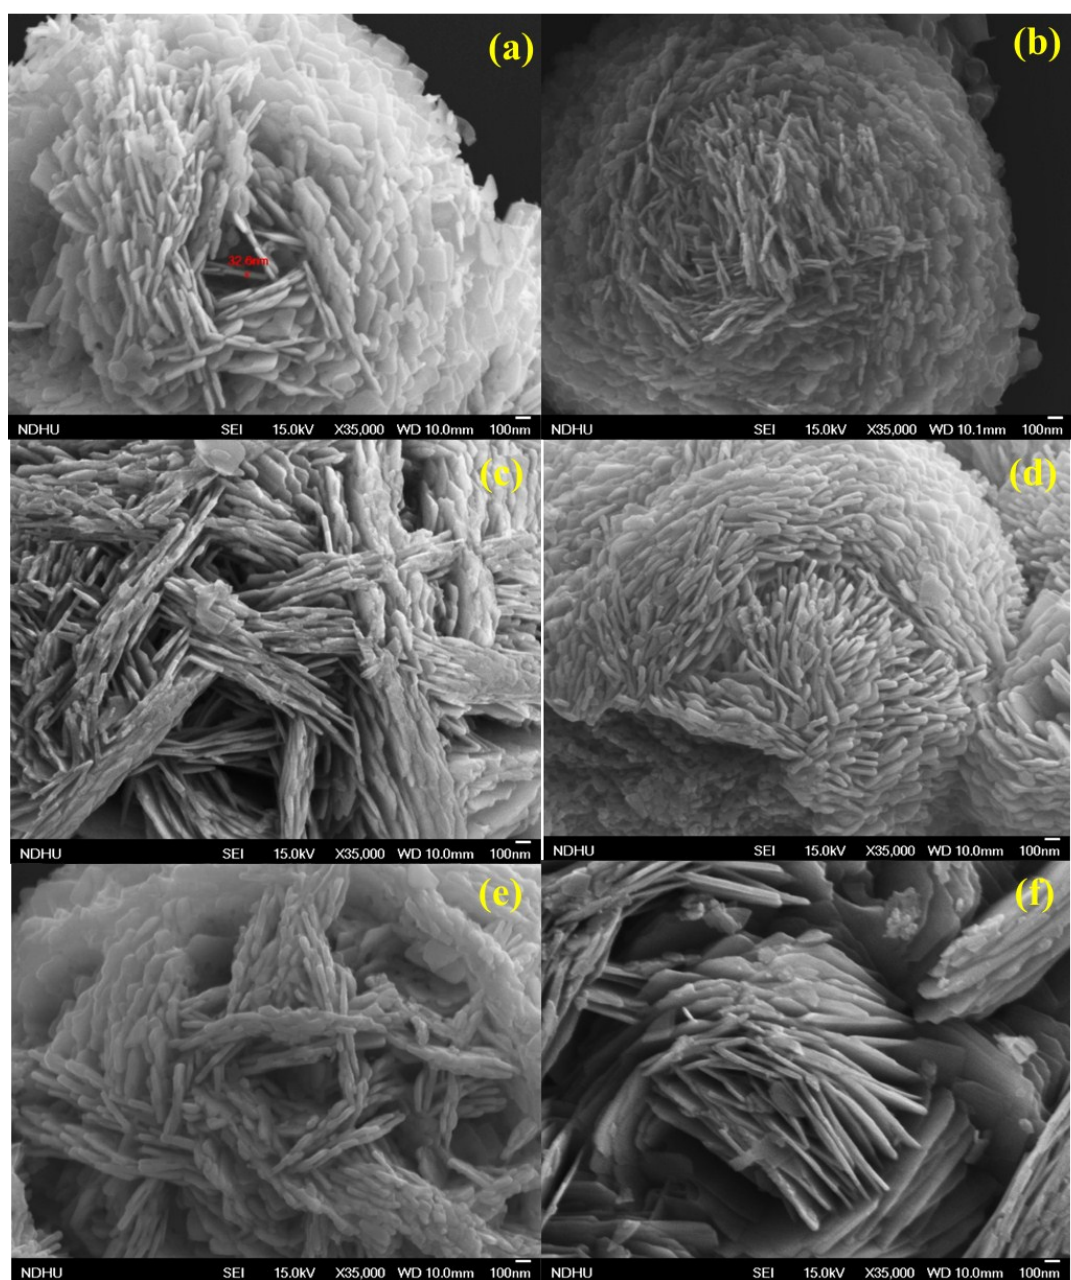

Figure S2. FE-SEM images for (a) BW, BW-Co-1, BW-Co-3, BW-Co-5, BW-Co-7 and BW-Co-9 photocatalysts

Figure S3.

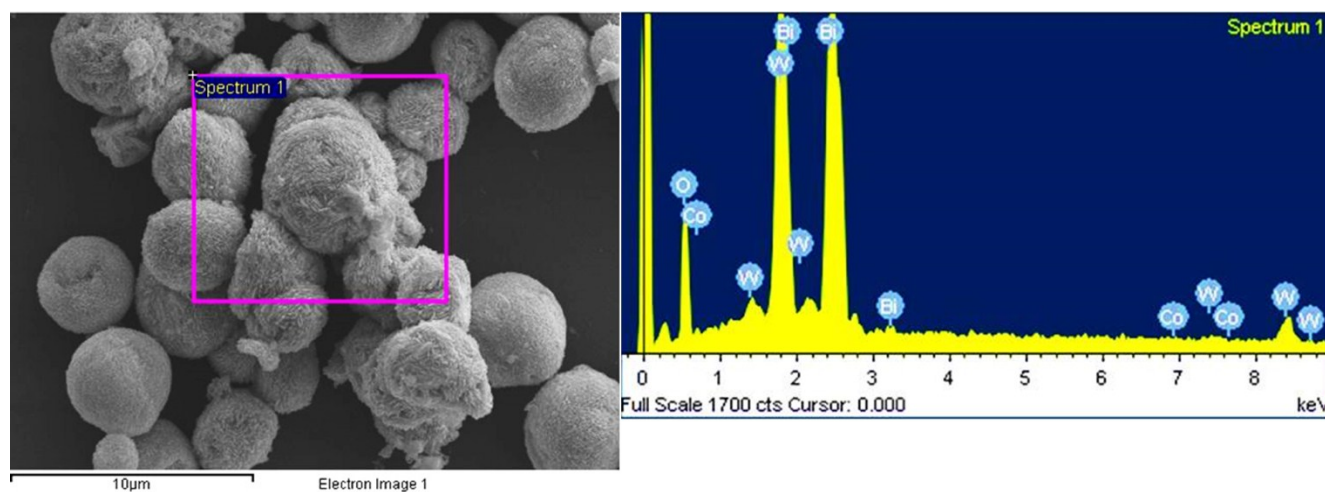

Figure S3. EDS analysis for BW-Co-5 photocatalyst

Figure S4.

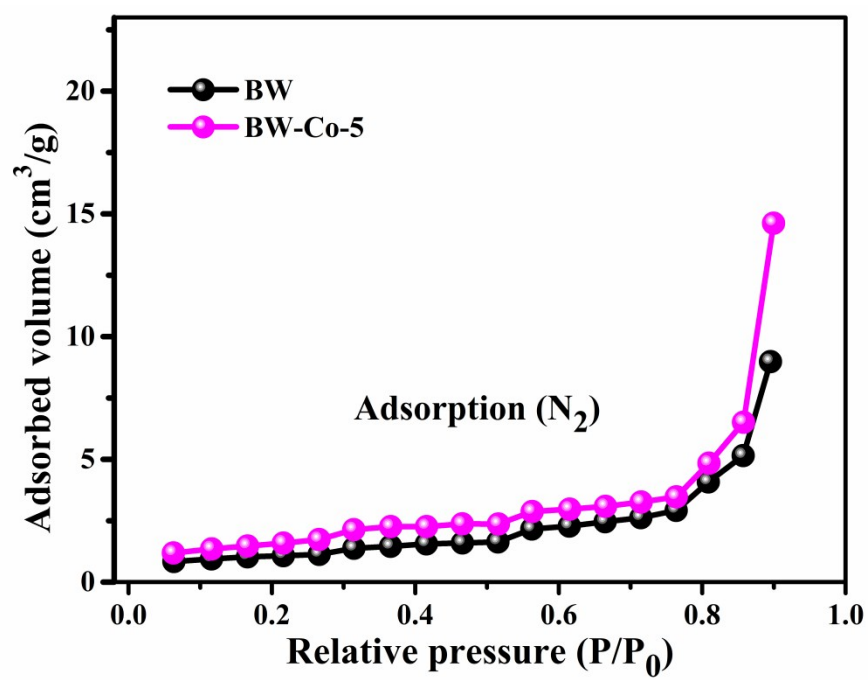

Figure S4. BET surface area of BW and BW-Co-5 photocatalysts

Figure S5.

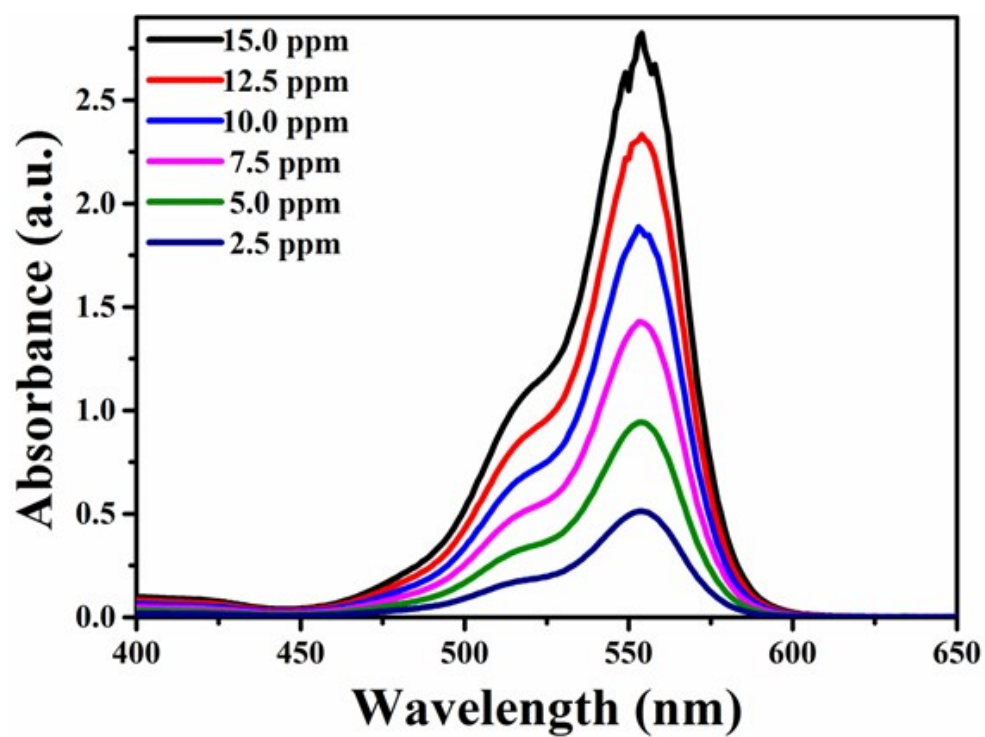

Figure S5. Absorbance spectra with different concentrations of RhB (15, 12.5, 10.0, 7.5, 5.0, and 2.5 ppm)
